# Supplementary material for: Investigation on fluorescein derivatives with thermally activated delayed fluorescence and their applications in imaging
Source: Royal Society of Chemistry journal article supplement (doi:10.1039/d2ra00593j), 2022-01-01
Supplement: d2ra00593j1.pdf [file d2ra00593j1.pdf]

## Supporting Information

### **Investigation on fluorescein derivatives with thermally activated delayed fluorescence and their applications in imaging**

Zhaoye Lv,<sup>a</sup> Jun Hou,<sup>a</sup> Junjie Yao,<sup>a</sup> Ye Yuan,<sup>a</sup> Yulan Qian,<sup>a</sup> Junyang Zhu,<sup>a</sup> Hongjuan

Zhao,<sup>a</sup> Xiaoqing Xiong<sup>\*ab</sup> and Chengqi Jiao<sup>\*\*c</sup>

<sup>a</sup> Key Lab of Textile Cleaning, Dalian Polytechnic University, #1 Qinggongyuan,  
Dalian, 116034, P. R. China.

<sup>b</sup> State Key Laboratory of Fine Chemicals, Dalian University of Technology, #2  
Linggong Road, Dalian, 116024, P. R. China.

<sup>c</sup> School of Chemistry and Chemical Engineering, Liaoning Normal University, 850  
Huanghe Road, Dalian 116029, P.R. China.

Tel: +86-041186332096

E-mail: xiongxq@dlpu.edu.cn; jiaocq@lnnu.edu.cn

(This supporting information includes two schemes, twenty-six figures and ten tables  
in thirty-three pages.)

## **General information**

$^1\text{H}$ -NMR and  $^{13}\text{C}$ -NMR spectra were recorded on a VARIAN INOVA-400 spectrometer with chemical shifts reported as ppm (in DMSO or methanol, TMS as internal standard). The following abbreviations are used to indicate the multiplicities: s, singlet; d, doublet; t, triplet; q, quartet; m, multiplet; br, broad. Mass spectrometric data were obtained on a Q-TOF Micro mass spectrometry. Absorption spectra were measured on a Perkin Elmer Lambda35 UV-Vis spectrophotometer. Steady-state fluorescence was measured by a Varian Cary Eclipse fluorescence spectrophotometer (Serial No.: FL1109M018). Time-resolved luminescence spectra were obtained using a Perkin-Elmer LS 50B luminescence spectrometer with the following settings: total decay time, 5 ms; delay time, 0.1 ms; gate time, 1.0 ms; cycle time, 20 ms; excitation and emission slits, 15 nm. Nanosecond time-resolved transient absorption spectra were obtained using an LP920 laser flash photolysis spectrometer (Edinburgh Instruments, UK). Nanosecond fluorescence lifetimes were measured using the TCSPC technique on a F900 system with laser excitation at 476.20 nm, and microsecond fluorescence lifetimes were measured by nanosecond pulsed OPO laser synchronized with spectrofluorometer. For the temperature-dependent experiment, the sample was placed in an Optistat DN-V liquid nitrogen cryostat (Oxford, UK) with temperatures controlled between 77 and 300 K. The direct detection technique was applied to measure microsecond lifetimes using a photomultiplier tube (PMT, R928).

## **Cell culture and staining**

MCF-7 cell lines were cultured in DEME (Invitrogen) supplemented with 10%

FCS (Invitrogen). Then the pretreated MCF-7 cells were stained with **DCF-MPYA** (20  $\mu$ M) and **FL** (20  $\mu$ M) for 120 min at ambient temperature and then imaged with confocal fluorescence microscopy or time-resolved fluorescence microscopy. And a total of 40  $\mu$ L BSA (10 mM) was added into the system and incubated at 37°C in 5% CO<sub>2</sub> for 2 h. Cells were rinsed by clean PBS three times before imaging. For each dye's test, the fluorescent imaging pictures were obtained with an almostly equal parameter for control.

Cell imaging measurements were obtained with spectral confocal microscopes (Olympus, FV1000). The time-resolved luminescence imaging measurements were carried out on a laboratory-use luminescence microscope. The microscope, equipped with a 30 W xenon flash-lamp (Pulse 300, Photonic Research Systems Ltd.), UV-2A filters (Nikon, excitation filter, 510–560 nm; dichroic mirror, 400 nm; emission filter, > 420 nm). And a time-resolved digital black-and- white CCD camera system (Photonic Research Systems Ltd.) was used for the time-resolved luminescence imaging measurement with the conditions of delaytime, 15  $\mu$ s; gatetime, 100 ms; lamp-pulse width, 6 ms; and exposure time, 300 s. The time-resolved luminescence images are shown in pseudo-color treated by Simple PCI software.

#### **MTT assay for the cell cytotoxicity**

This involves the reduction of MTT (3-(4, 5-dimethylthiazol-2-yl)-2, 5-diphenyltetrazolium bromide) tetrazolium to MTT formazan pigment by the metabolic activity of living cells. COS-7 cells were seeded at a density of  $1 \sim 10^5$  cells/mL in a 96-well plate. After 24 h of cell attachment, cells were treated with

**DCF-MPYA** and **FL** at experimental concentration (20  $\mu$ M) from 0 h to 10 h. After incubation for 2 h, 4 h, 6 h, 8 h and 10 h, the medium was removed and cells were washed with PBS twice. MTT tetrazolium solution (100  $\mu$ L of 0.5 mg/mL in PBS) was added to each well, and the cells were further incubated at 37°C for 4 h in a 5% CO<sub>2</sub> humidified atmosphere. Excess MTT tetrazolium solution was then carefully removed and the colored formazan was dissolved in 100  $\mu$ L dimethyl sulfoxide (DMSO). The plate was shaken for 10 min and the absorbance was measured at 600 nm using a microplate reader.

### **Computational Method**

Conformational search for different dyes in its neutral and anionic forms were preformed using the conformer-rotamer ensemble sampling (CREST) algorithm<sup>1</sup> that relies on the semi-empirical tight-binding based quantum chemistry method GFN2-xTB level<sup>2</sup> of XTB code<sup>3</sup> (version 6.1) in GBSA dimethyl sulfoxide solvent. The default settings and thresholds for the MTD-GC(RMSD)/GFN2-xTB simulation were used, in which an extensive root mean square deviation (RMSD) based meta-dynamics sampling (MTD) is performed with an extra genetic z matrix crossing (GC) step at the end<sup>4</sup>.

All quantum mechanical calculations were used Gaussian 09 program software<sup>5</sup>. Geometry optimizations were performed with empirical dispersion corrected PBE0<sup>6</sup> functional (D3BJ damping<sup>7</sup>) and the 6-31G(d) basis set. Frequency analyses were calculated at the same level to confirm the nature of the stationary points as equilibrium structure with all real frequencies. All the thermodynamic quantities were

computed in the GoodVibes code<sup>8</sup> with quasi-harmonic corrections.<sup>9</sup> Higher level single-point energy calculations were performed at the PBE0-D3BJ/6-311++G(d, p) level with IEF-PCM model<sup>10</sup> with dimethyl sulfoxide as a solvent. The relative free energies reported in the conformational search were computed at PBE0-D3BJ/6-311++G(d, p)(SMD, DMSO)//PBE0-D3BJ/6-31+G(d) level. CYLview was used for molecular visualizations.<sup>11</sup> DFT and linear-response TD-DFT in combination with PBE0-D3BJ functional with 6-31G(d) basis set were employed to calculate the ground ( $S_0$ ) and excited state ( $S_1$ ) of the target molecules with lowest free energy. All calculations were conducted using the IEF-PCM model with dimethyl sulfoxide as a solvent. Electron excitation energy and emission energy were calculated in the assumed nonequilibrium and equilibrium solvation, respectively.

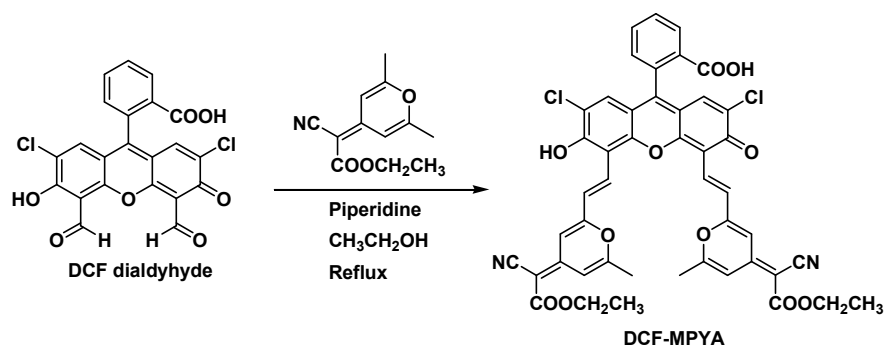

**Scheme S1** Synthetic routines of the dye **DCF-MPYA**

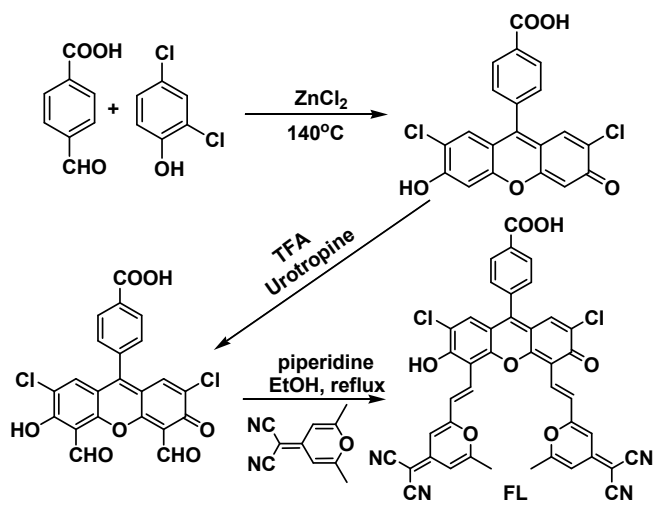

**Scheme S2** Synthetic routines of the dye **FL**.

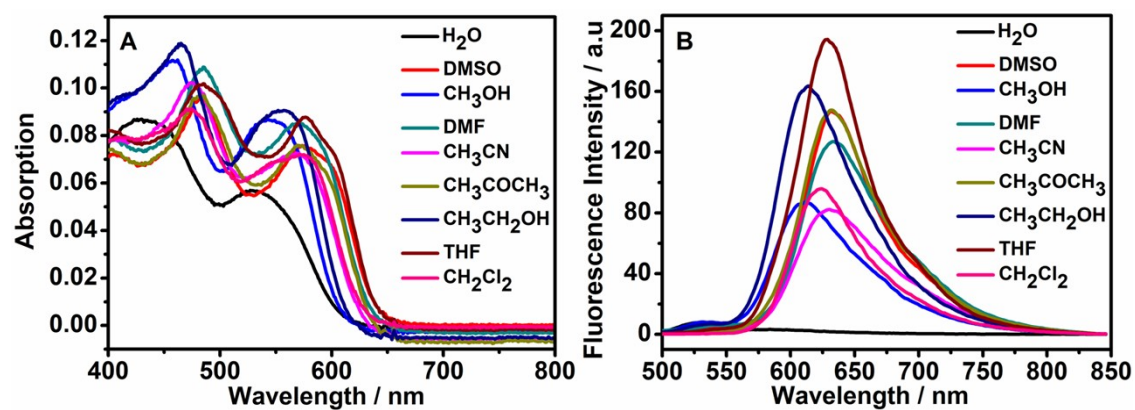

**Fig. S1** (A) UV spectra of **DCF-MPYA** (2.0 μM) in different solvents. (B) fluorescent spectra of **DCF-MPYA** (2.0 μM) in different solvents.

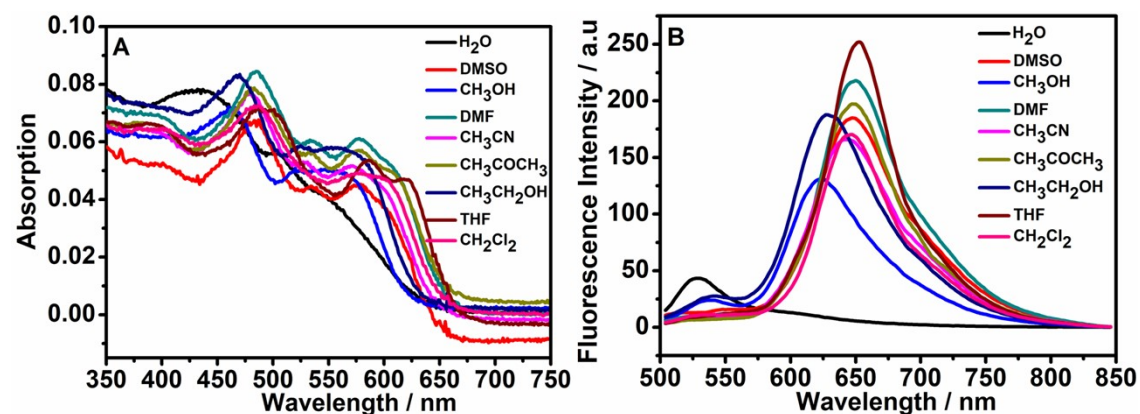

**Fig. S2** (A) UV spectra of **FL** (2.0 μM) in different solvents. (B) fluorescent spectra of **FL** (2.0 μM) in different solvents.

**Tab. S1** Photophysical properties of **DCF-MPYA** in different solvents

| Solvents                           | $\lambda_{ab1}^{[a]}$ | $\lambda_{ab2}^{[a]}$ | $\lambda_{em1}^{[a]}$ | $\lambda_{em2}^{[a]}$ | $\varepsilon(\times 10^5)^{[b]}$ | $\varepsilon(\times 10^5)^{[b]}$ | $\Phi^{[c]}$ | Stokes shift (nm) |
|------------------------------------|-----------------------|-----------------------|-----------------------|-----------------------|----------------------------------|----------------------------------|--------------|-------------------|
| H <sub>2</sub> O                   | 430                   | 527                   | 525                   | --                    | 0.43                             | 0.28                             | 0.013        | 95                |
| DMSO                               | 483                   | 573                   | --                    | 632                   | 0.48                             | 0.38                             | 0.24         | 149               |
| CH <sub>3</sub> OH                 | 462                   | 546                   | 531                   | 611                   | 0.56                             | 0.43                             | 0.14         | 149               |
| DMF                                | 485                   | 570                   | 540                   | 634                   | 0.54                             | 0.43                             | 0.23         | 149               |
| CH <sub>3</sub> CN                 | 474                   | 568                   | 540                   | 631                   | 0.51                             | 0.36                             | 0.14         | 157               |
| CH <sub>3</sub> COCH <sub>3</sub>  | 485                   | 569                   | --                    | 632                   | 0.48                             | 0.38                             | 0.23         | 147               |
| CH <sub>3</sub> CH <sub>2</sub> OH | 465                   | 557                   | 533                   | 616                   | 0.56                             | 0.45                             | 0.25         | 151               |
| THF                                | 485                   | 576                   | --                    | 629                   | 0.51                             | 0.44                             | 0.30         | 144               |
| CH <sub>2</sub> Cl <sub>2</sub>    | 475                   | 575                   | 489                   | 624                   | 0.46                             | 0.36                             | 0.13         | 149               |

<sup>[a]</sup>nm; <sup>[b]</sup>mol<sup>-1</sup>cm<sup>-1</sup>L; <sup>[c]</sup>Rhodamine B was used as a standard ( $\Phi=0.69$  in EtOH)<sup>[13]</sup>.

**Tab. S2** Photophysical properties of **FL** in different solvents

| Solvents                           | $\lambda_{ab1}^{[a]}$ | $\lambda_{ab2}^{[a]}$ | $\lambda_{em1}^{[a]}$ | $\lambda_{em2}^{[a]}$ | $\varepsilon(\times 10^5)^{[b]}$ | $\varepsilon(\times 10^5)^{[b]}$ | $\Phi^{[c]}$ | Stokes shift (nm) |
|------------------------------------|-----------------------|-----------------------|-----------------------|-----------------------|----------------------------------|----------------------------------|--------------|-------------------|
| H <sub>2</sub> O                   | 446                   | 542                   | 525                   | --                    | 0.42                             | 0.27                             | 0.014        | 79                |
| DMSO                               | 485                   | 571                   | --                    | 644                   | 0.32                             | 0.25                             | 0.25         | 159               |
| CH <sub>3</sub> OH                 | 462                   | 547                   | 529                   | 623                   | 0.37                             | 0.28                             | 0.094        | 161               |
| DMF                                | 485                   | 564                   | --                    | 636                   | 0.34                             | 0.28                             | 0.28         | 151               |
| CH <sub>3</sub> CN                 | 473                   | 570                   | --                    | 644                   | 0.35                             | 0.22                             | 0.096        | 171               |
| CH <sub>3</sub> COCH <sub>3</sub>  | 479                   | 565                   | --                    | 644                   | 0.36                             | 0.26                             | 0.20         | 176               |
| CH <sub>3</sub> CH <sub>2</sub> OH | 468                   | 557                   | 532                   | 626                   | 0.45                             | 0.32                             | 0.17         | 158               |
| THF                                | 486                   | 574                   | --                    | 645                   | 0.37                             | 0.30                             | 0.33         | 159               |
| CH <sub>2</sub> Cl <sub>2</sub>    | 472                   | 568                   | --                    | 636                   | 0.32                             | 0.25                             | 0.21         | 164               |

<sup>[a]</sup>nm; <sup>[b]</sup>mol<sup>-1</sup>cm<sup>-1</sup>L; <sup>[c]</sup>Rhodamine B was used as a standard ( $\Phi=0.69$  in EtOH)<sup>[13]</sup>.

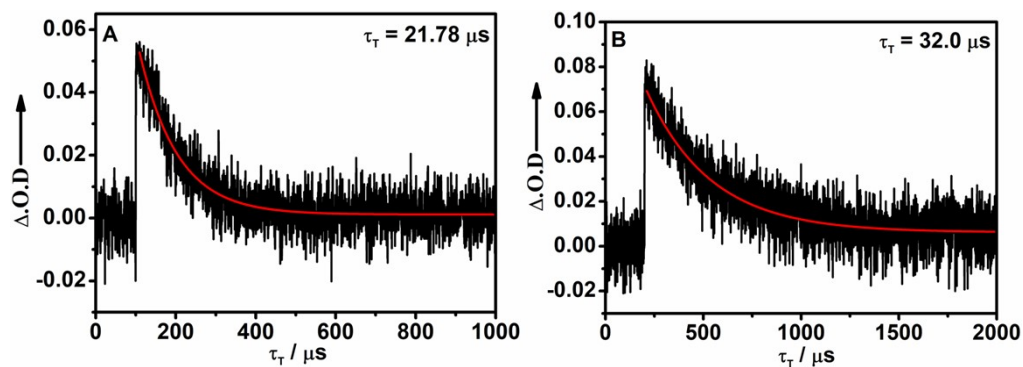

**Fig. S3** (A) Decay trace of **DCF-MPYA** ( $2.0 \times 10^{-5}$  M in ethanol) at 465 nm after pulsed laser excitation ( $\lambda_{\text{ex}} = 355$  nm) under  $\text{N}_2$  atmosphere. (B) Decay trace of **FL** ( $2.0 \times 10^{-5}$  M in ethanol) at 465 nm after pulsed laser excitation ( $\lambda_{\text{ex}} = 355$  nm) under  $\text{N}_2$  atmosphere.

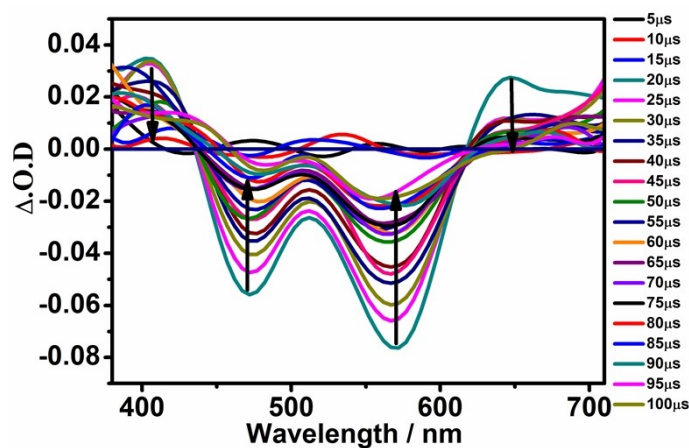

**Fig. S4** Nanosecond time-resolved transient difference absorption spectra of **FL** ( $2.0 \times 10^{-5}$  M in deaerated ethanol) with different delay time, excitation wavelength at 532 nm.

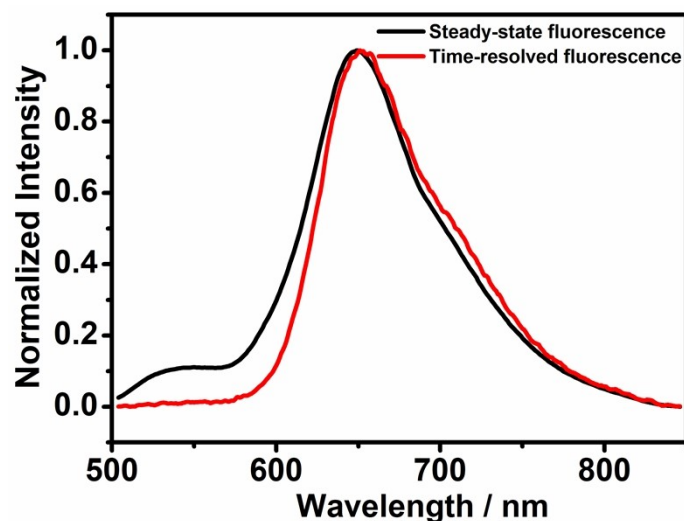

**Fig. S5** Normalized emission spectra for FL (10.0  $\mu\text{M}$  in deaerated  $\text{CH}_3\text{CN}$ ). Black line: Steady-state fluorescence spectrum under air atmosphere (delay time, 0 s). Red line: time-resolved fluorescence spectrum under  $\text{N}_2$  atmosphere. All the delayed detection was carried out in phosphorescence mode (total decay time, 5 ms; delay time, 0.1 ms; gate time, 1.0 ms), and the excitation wavelength was 465 nm.

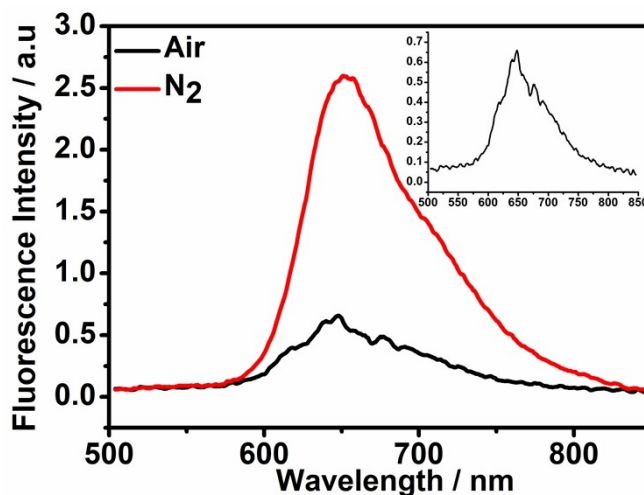

**Fig. S6** Time-resolved fluorescence spectra for FL (10.0  $\mu\text{M}$  in  $\text{CH}_3\text{CN}$ ). Black line: time-resolved fluorescence spectrum under Air atmosphere. Red line: time-resolved fluorescence spectrum under  $\text{N}_2$  atmosphere. All the delayed detection was carried out in phosphorescence mode (total decay time, 5 ms; delay time, 0.1 ms; gate time, 1.0 ms), and the excitation wavelength was 465 nm.

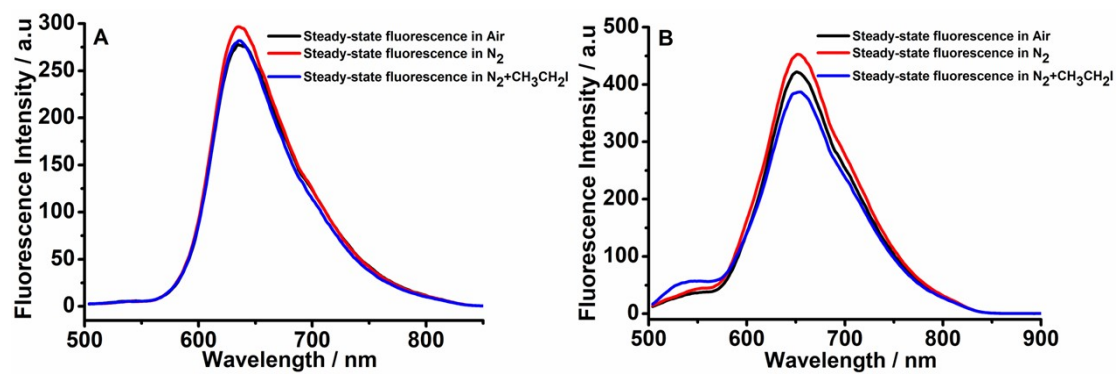

**Fig. S7** Prompt emission spectra for **DCF-MPYA** (A, 10.0  $\mu$ M in CH<sub>3</sub>CN) and **FL** (B, 10.0  $\mu$ M in CH<sub>3</sub>CN). Black line: steady-state fluorescence spectrum under Air atmosphere; red line: steady-state fluorescence spectrum under N<sub>2</sub> atmosphere; blue line: steady-state fluorescence spectrum after the addition of CH<sub>3</sub>CH<sub>2</sub>I under N<sub>2</sub> atmosphere. All the detection was carried out in fluorescence mode and the excitation wavelength was 465 nm.

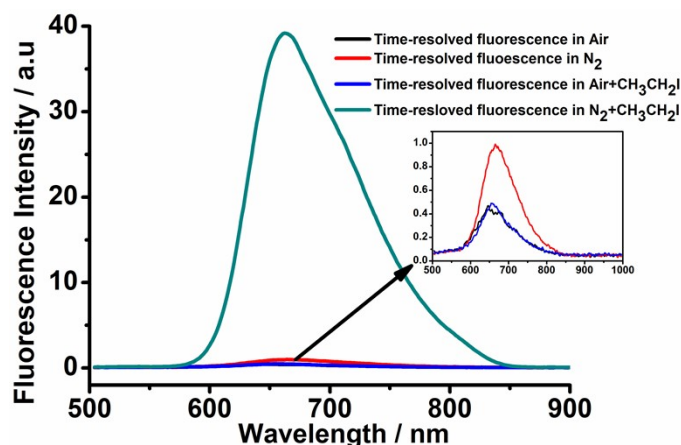

**Fig. S8** Time-resolved fluorescence spectra for FL (10.0  $\mu\text{M}$  in  $\text{CH}_3\text{CN}$ ). Black line: time-resolved fluorescence spectrum under Air atmosphere; red line: time-resolved fluorescence spectrum under  $\text{N}_2$  atmosphere; blue line: time-resolved fluorescence spectrum after the addition of  $\text{CH}_3\text{CH}_2\text{I}$  under Air atmosphere; dark cyan line: time-resolved fluorescence spectrum after the addition of  $\text{CH}_3\text{CH}_2\text{I}$  under  $\text{N}_2$  atmosphere. Inset is the enlarged view of spectra with low fluorescence intensity. All the delayed detection was carried out in phosphorescence mode (total decay time, 5 ms; delay time, 0.1 ms; gate time, 1.0 ms), and the excitation wavelength was 465 nm.

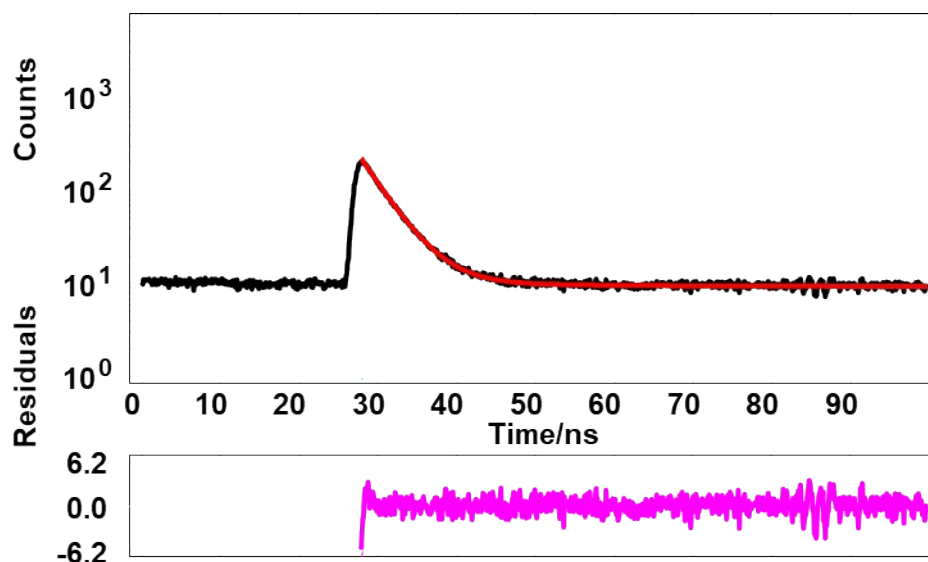

**Fig. S9** Prompt decay of **DCF-MPYA** ( $2.0 \times 10^{-5}$  mol/L) in  $\text{CH}_3\text{CN}$  at room temperature, excitation wavelength was 476.20 nm, monitored emission wavelength was 645 nm.

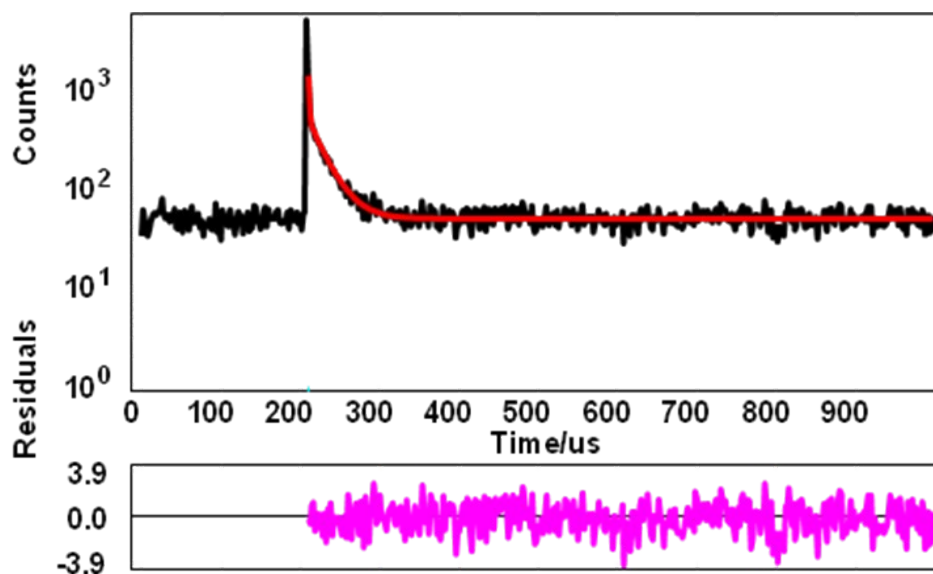

**Fig. S10** Emission decay of **DCF-MPYA** ( $2.0 \times 10^{-5}$  mol/L) in  $\text{CH}_3\text{CN}$  at room temperature, curves show the profiles after deoxygenating ( $\tau = 13.16 \mu\text{s}$ ). Monitored emission wavelength was 645 nm.

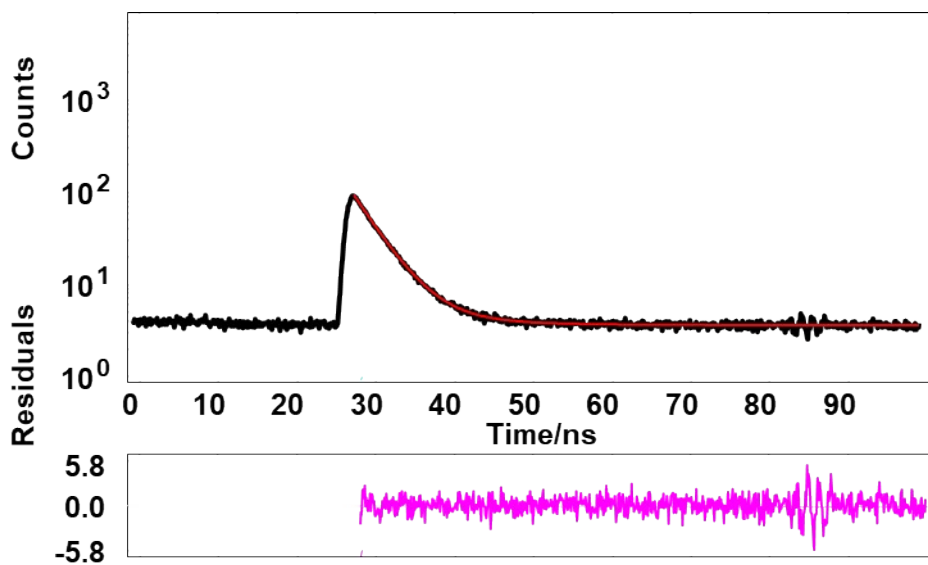

**Fig. S11** Prompt decay of FL ( $2.0 \times 10^{-5}$  mol/L) in CH<sub>3</sub>CN at room temperature, excitation wavelength was 476.20 nm, monitored emission wavelength was 651 nm.

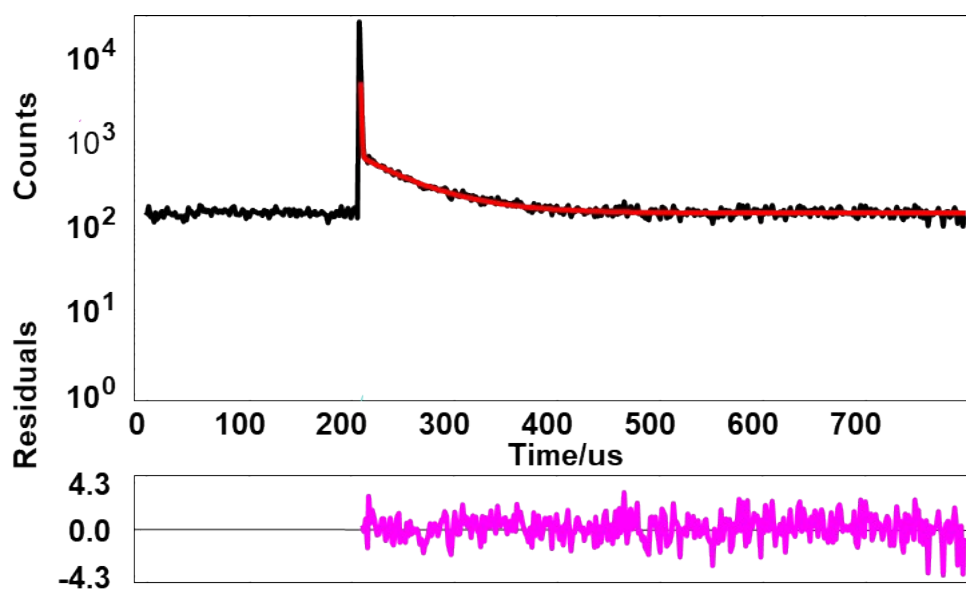

**Fig. S12** Emission decay of FL ( $2.0 \times 10^{-5}$  mol/L) in CH<sub>3</sub>CN at room temperature, curves show the profiles after deoxygenating ( $\tau = 23.72 \mu\text{s}$ ), monitored emission wavelength was 651 nm.

**Tab. S3** Fluorescent lifetime compositions of prompt components for **DCF-MPYA** in deaerated CH<sub>3</sub>CN. Excitation with a 476.20 nm picosecond laser, the decay of the emission was monitored at 645 nm.

| Monitoring wavelength (nm) | $\tau_1$ (ns) <sup>[a]</sup> | $n_1\%$ <sup>[b]</sup> | $\tau_2$ (ns) <sup>[a]</sup> | $n_2\%$ <sup>[b]</sup> | $\tau_p$ (ns) <sup>[c]</sup> |
|----------------------------|------------------------------|------------------------|------------------------------|------------------------|------------------------------|
| 634 (deaerated)            | 3.31                         | 96.00                  | 25.61                        | 0.04                   | 4.20                         |

<sup>[a]</sup>Obtained from the double-exponential fitting of transient decay curves on a 100 ns scale; <sup>[b]</sup>The contribution of each component to average lifetime; <sup>[c]</sup>The average fluorescence lifetime of prompt component.

**Tab. S4** Fluorescent lifetime compositions of prompt components for **FL** in deaerated CH<sub>3</sub>CN. Excitation with a 476.20 nm picosecond laser, the decay of the emission was monitored at 651 nm.

| Monitoring wavelength (nm) | $\tau_1$ (ns) <sup>[a]</sup> | $n_1\%$ <sup>[b]</sup> | $\tau_2$ (ns) <sup>[a]</sup> | $n_2\%$ <sup>[b]</sup> | $\tau_p$ (ns) <sup>[c]</sup> |
|----------------------------|------------------------------|------------------------|------------------------------|------------------------|------------------------------|
| 640 (deaerated)            | 3.21                         | 93.85                  | 10.67                        | 6.15                   | 3.67                         |

<sup>[a]</sup>Obtained from the double-exponential fitting of transient decay curves on a 100 ns scale; <sup>[b]</sup>The contribution of each component to average lifetime; <sup>[c]</sup>The average fluorescence lifetime of prompt component.

**Tab. S5** Luminescence lifetime compositions of **DCF-MPYA** (20.0  $\mu\text{M}$  in  $\text{CH}_3\text{OH}/\text{CH}_3\text{CH}_2\text{OH} = 5/4$  (v/v)) in different temperatures. Excited at 485 nm (nanosecond pulsed OPO laser synchronized with spectrofluorometer) and monitored at 634 nm.

| Temperature  | $\tau_1$ ( $\mu\text{s}$ ) <sup>[a]</sup> | $n_1\%$ <sup>[b]</sup> | $\tau_2$ ( $\mu\text{s}$ ) <sup>[a]</sup> | $n_2\%$ <sup>[b]</sup> | $\tau_d$ ( $\mu\text{s}$ ) <sup>[c]</sup> |
|--------------|-------------------------------------------|------------------------|-------------------------------------------|------------------------|-------------------------------------------|
| <b>77 K</b>  | 0.94                                      | 46.38                  | 11.26                                     | 53.62                  | 6.48                                      |
| <b>100 K</b> | 0.96                                      | 47.45                  | 11.72                                     | 52.55                  | 6.61                                      |
| <b>140 K</b> | 0.95                                      | 47.72                  | 11.79                                     | 52.28                  | 6.62                                      |
| <b>180 K</b> | 0.87                                      | 51.81                  | 11.75                                     | 48.19                  | 6.12                                      |
| <b>220 K</b> | 0.83                                      | 51.02                  | 11.24                                     | 48.98                  | 5.99                                      |
| <b>260 K</b> | 0.91                                      | 52.46                  | 11.24                                     | 47.54                  | 5.82                                      |
| <b>300 K</b> | 0.87                                      | 52.11                  | 10.89                                     | 47.89                  | 5.67                                      |

<sup>[a]</sup>Obtained from the double-exponential fitting of transient decay curves on an 800  $\mu\text{s}$  scale; <sup>[b]</sup>The contribution of each component to average lifetime; <sup>[c]</sup>The average fluorescence lifetime of delayed component.

**Tab. S6** Luminescence lifetime compositions of **FL** (20.0  $\mu\text{M}$  in  $\text{CH}_3\text{OH}/\text{CH}_3\text{CH}_2\text{OH}$  = 5/4(v/v)) in different temperatures. Excited at 485 nm (nanosecond pulsed OPO laser synchronized with spectrofluorometer) and monitored at 640 nm.

| Temperature  | $\tau_1$ ( $\mu\text{s}$ ) <sup>[a]</sup> | $n_1$ % <sup>[b]</sup> | $\tau_2$ ( $\mu\text{s}$ ) <sup>[a]</sup> | $n_2$ % <sup>[b]</sup> | $\tau_d$ ( $\mu\text{s}$ ) <sup>[c]</sup> |
|--------------|-------------------------------------------|------------------------|-------------------------------------------|------------------------|-------------------------------------------|
| <b>77 K</b>  | 1.30                                      | 39.24                  | 12.92                                     | 60.76                  | 8.37                                      |
| <b>100 K</b> | 1.31                                      | 37.55                  | 12.95                                     | 62.45                  | 8.58                                      |
| <b>140 K</b> | 1.33                                      | 37.54                  | 13.14                                     | 62.46                  | 8.64                                      |
| <b>180 K</b> | 1.22                                      | 43.14                  | 12.84                                     | 56.86                  | 7.32                                      |
| <b>220 K</b> | 0.98                                      | 50.80                  | 12.24                                     | 49.14                  | 6.26                                      |
| <b>260 K</b> | 0.89                                      | 52.39                  | 11.68                                     | 47.61                  | 5.78                                      |
| <b>300 K</b> | 0.91                                      | 52.62                  | 11.48                                     | 47.38                  | 5.67                                      |

<sup>[a]</sup>Obtained from the double-exponential fitting of transient decay curves on an 800  $\mu\text{s}$  scale; <sup>[b]</sup>The contribution of each component to average lifetime; <sup>[c]</sup>The average fluorescence lifetime of delayed component.

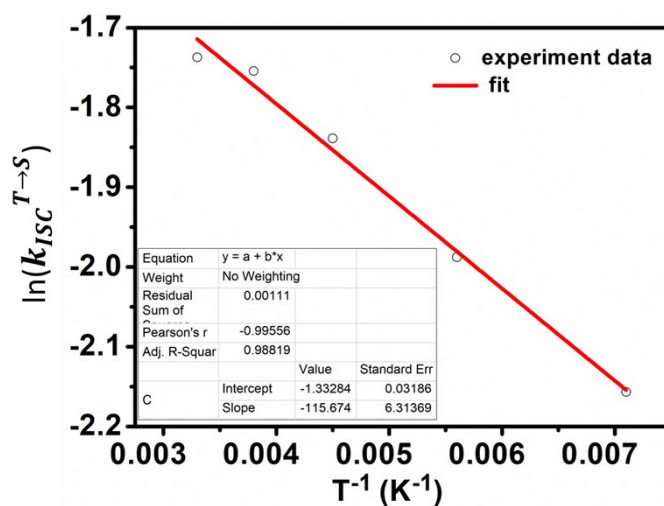

**Fig. 13** Logarithm of the fluorescence decay rate vs the reciprocal of temperature for **FL**; red line represents the fitting curves that obtained on the basis of equation 1.

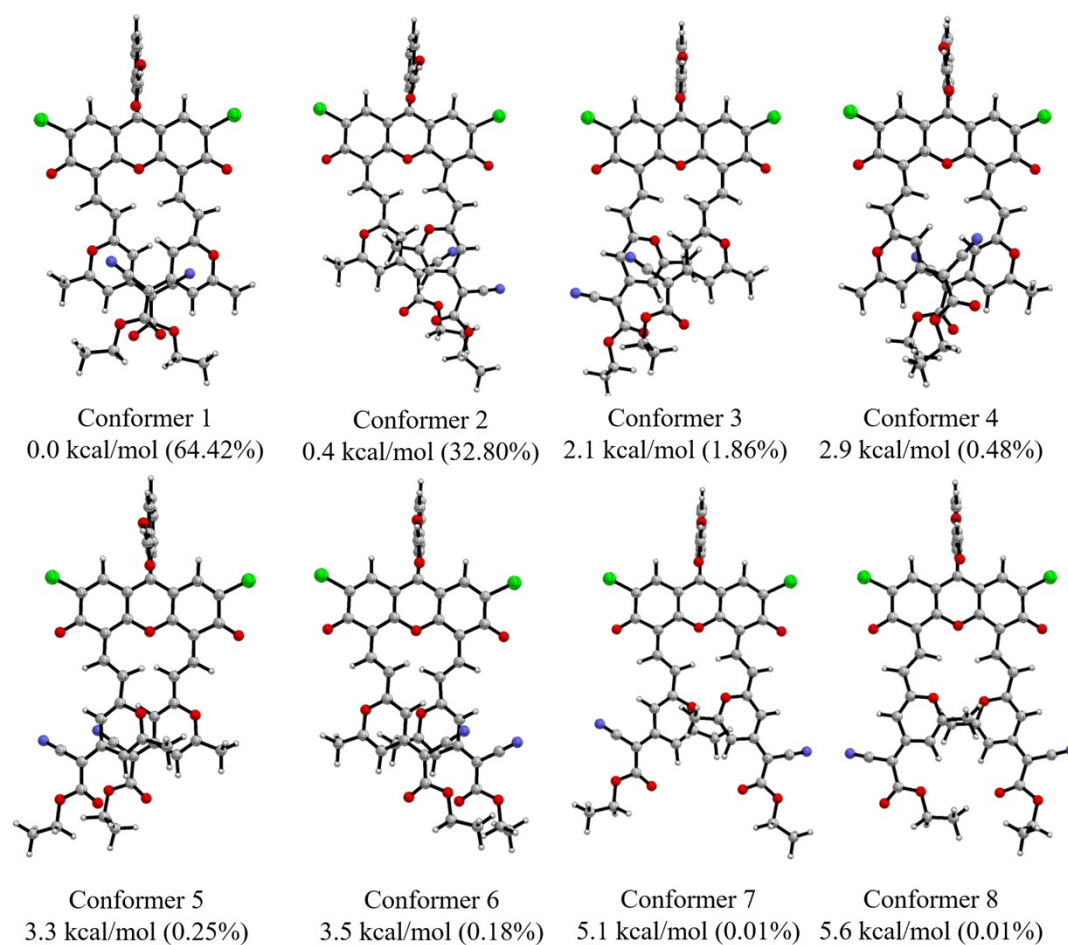

**Fig. S14** Different conformers of [DCF-MPYA-H]<sup>-</sup> with corresponding relative free energy (kcal/mol) and Boltzmann population (value in parentheses).

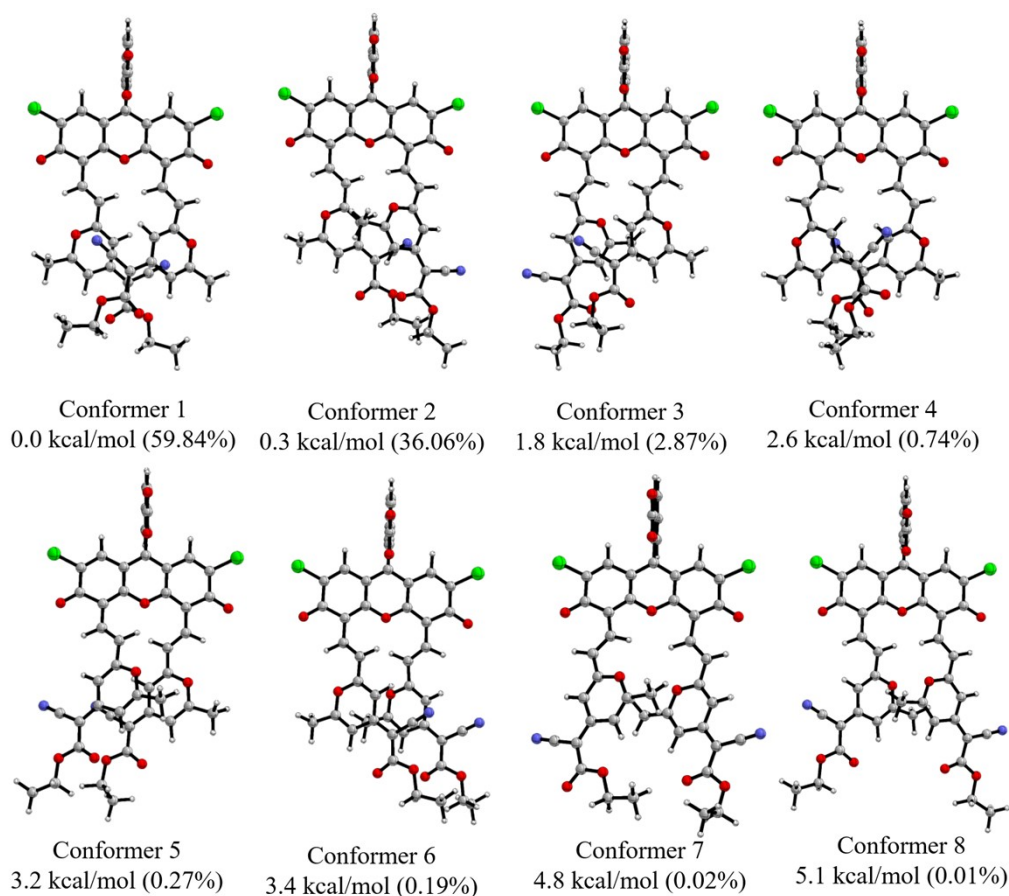

**Fig. S15** Different conformers of  $[\text{DCF-MPYA-2H}]^{2-}$  with corresponding relative free energy (kcal/mol) and Boltzmann population (value in parentheses).

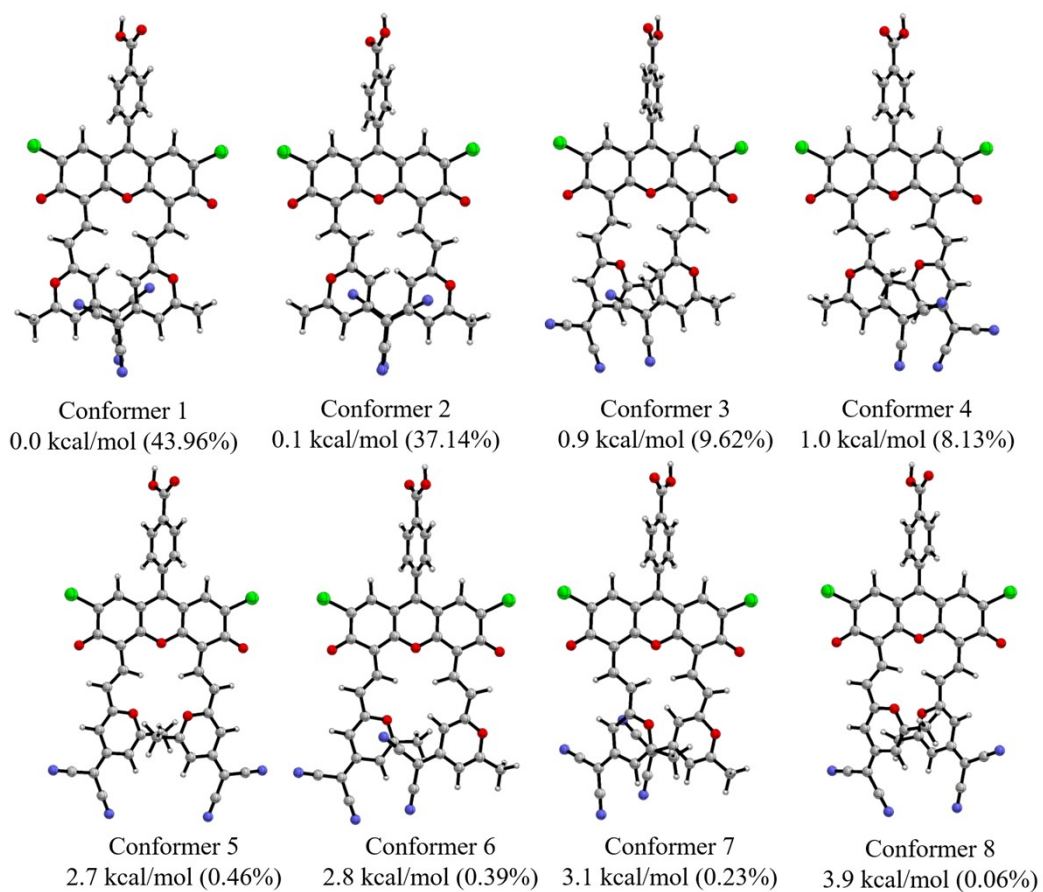

**Fig. S16** Different conformers of  $[\text{FL-H}]^-$  with corresponding relative free energy (kcal/mol) and Boltzmann population (value in parentheses).

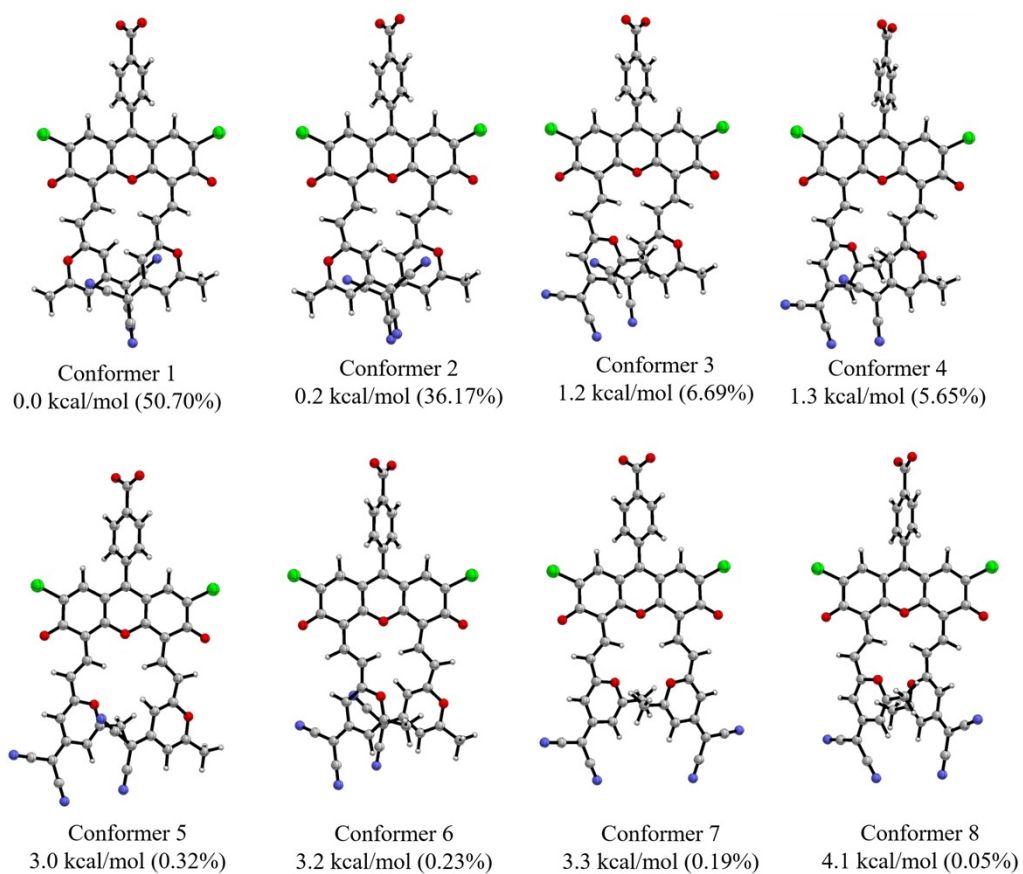

**Fig. S17** Different conformers of  $[\text{FL-2H}]^{2-}$  with corresponding relative free energy (kcal/mol) and Boltzmann population (value in parentheses).

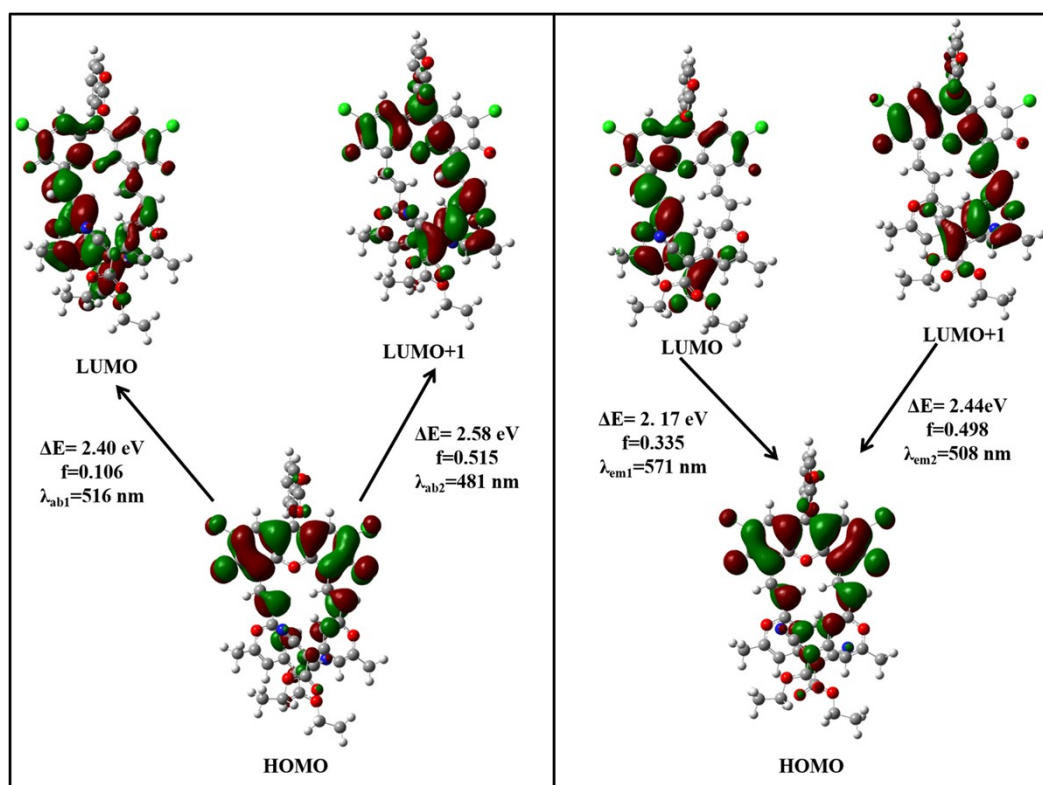

**Fig. S18** Frontier molecular orbital plots of [DCF-MPYA-2H]<sup>2-</sup> in DMSO; they are involved in vertical excitation (UV–vis absorption) and emission.

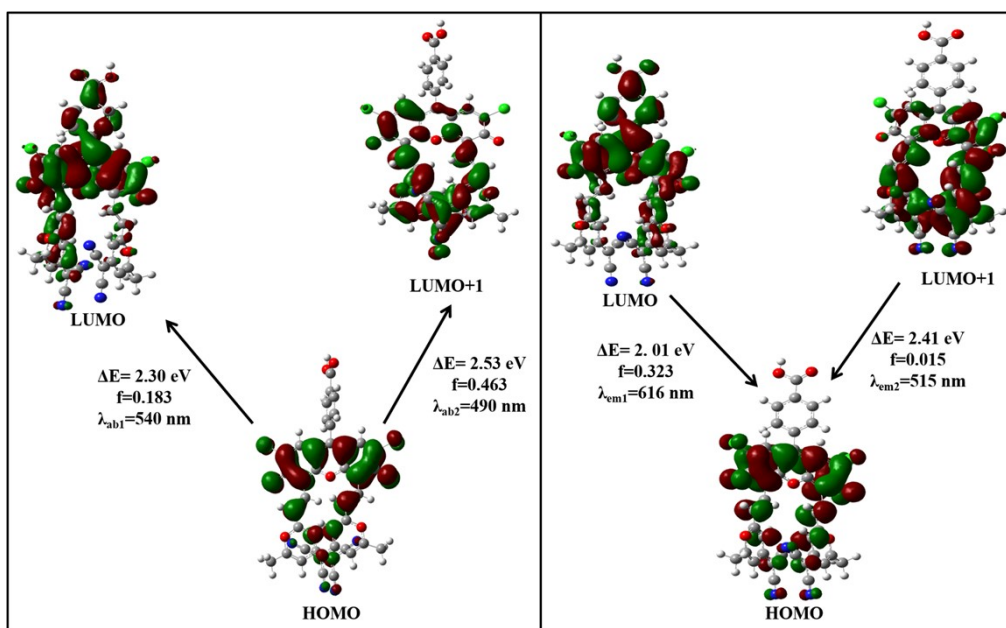

**Fig. S19** Frontier molecular orbital plots of [FL-H] in DMSO; they are involved in vertical excitation (UV-vis absorption) and emission.

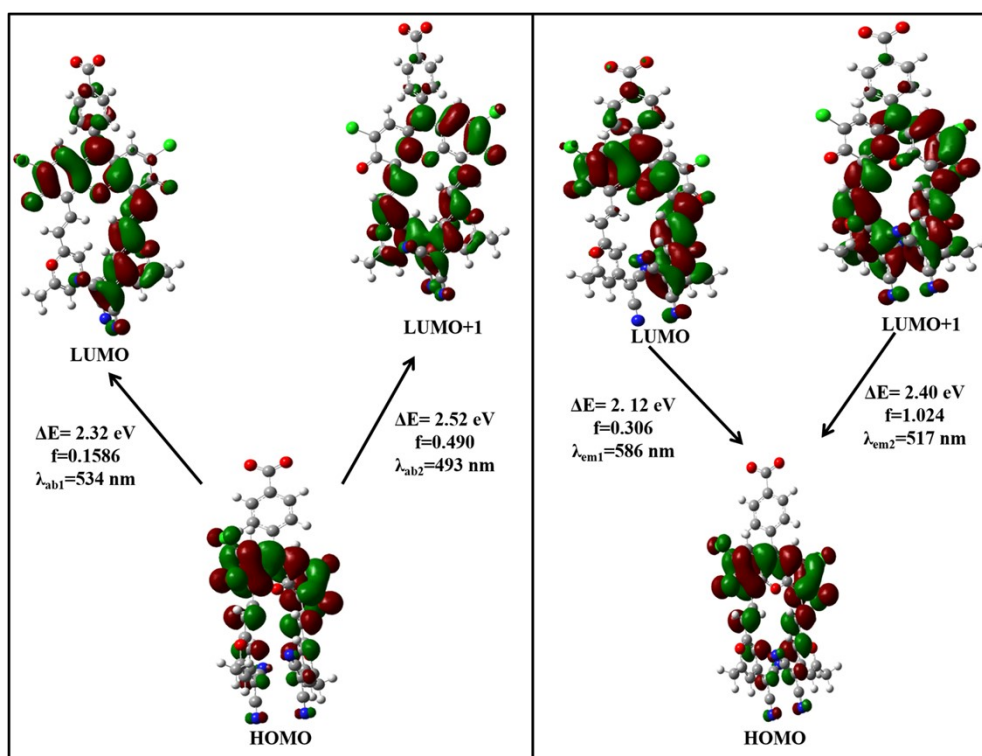

**Fig. S20** Frontier molecular orbital plots of [FL-2H]<sup>2</sup> in DMSO; they are involved in vertical excitation (UV-vis absorption) and emission.

**Tab. S7** Calculated electronic transition data in terms of excitation energies (E/eV), absorption wavelengths ( $\lambda_{ab}/\text{nm}$ ), oscillator Strengths ( $f_{ab}$ ), and electronic compositions for [DCF-MPYA-H]<sup>-</sup> and [FL-H]<sup>-</sup> in DMSO.

| Compound                  | Electronic transition <sup>a</sup> | Excitation energy ( $\lambda_{ab}/\text{nm}$ ) | $f^b$ | Composition <sup>c</sup> | CI <sup>d</sup> |
|---------------------------|------------------------------------|------------------------------------------------|-------|--------------------------|-----------------|
| [DCF-MPYA-H] <sup>-</sup> | S <sub>0</sub> →S <sub>1</sub>     | 2.39 eV (519)                                  | 0.166 | H→L                      | 0.62            |
|                           | S <sub>0</sub> →S <sub>2</sub>     | 2.63 eV (472)                                  | 0.502 | H→L+1                    | 0.68            |
| [FL-H] <sup>-</sup>       | S <sub>0</sub> →S <sub>1</sub>     | 2.30 eV (540)                                  | 0.183 | H→L                      | 0.64            |
|                           | S <sub>0</sub> →S <sub>2</sub>     | 2.53 eV (490)                                  | 0.463 | H→L+1                    | 0.68            |

<sup>a</sup> Only selected excitation states were considered. The numbers in parentheses are the excitation energy in wavelength. <sup>b</sup> Oscillator strength. <sup>c</sup> H stands for HOMO and L stands for LUMO. Only the configurations are presented. <sup>d</sup> Coefficient of the wave function for excitations. The CI coefficients are in absolute values.

**Tab. S8** Calculated electronic transition data in terms of excitation energies (E/eV), absorption wavelengths ( $\lambda_{ab}/nm$ ), oscillator Strengths ( $f_{ab}$ ), and electronic compositions for [DCF-MPYA-2H]<sup>2-</sup> and [FL-2H]<sup>2-</sup> in DMSO.

| Compound                    | Electronic transition <sup>a</sup> | Excitation energy ( $\lambda_{ab}/nm$ ) | $f^b$  | Composition <sup>c</sup> | CI <sup>d</sup> |
|-----------------------------|------------------------------------|-----------------------------------------|--------|--------------------------|-----------------|
| [DCF-MPYA-2H] <sup>2-</sup> | S <sub>0</sub> →S <sub>1</sub>     | 2.40 eV (534)                           | 0.106  | H→L                      | 0.42            |
|                             | S <sub>0</sub> →S <sub>2</sub>     | 2.58 eV (481)                           | 0.515  | H→L+1                    | -0.40           |
| [FL-2H] <sup>2-</sup>       | S <sub>0</sub> →S <sub>1</sub>     | 2.32 eV (534)                           | 0.1586 | H→L                      | 0.63            |
|                             | S <sub>0</sub> →S <sub>2</sub>     | 2.52 eV (493)                           | 0.490  | H→L+1                    | 0.65            |

<sup>a</sup> Only selected excitation states were considered. The numbers in parentheses are the excitation energy in wavelength. <sup>b</sup> Oscillator strength. <sup>c</sup> H stands for HOMO and L stands for LUMO. Only the configurations are presented. <sup>d</sup> Coefficient of the wave function for excitations. The CI coefficients are in absolute values.

**Tab. S9** Calculated electronic transition data in terms of excitation energies ( $E/\text{eV}$ ), emission wavelengths ( $\lambda_{\text{em}}/\text{nm}$ ), oscillator strengths ( $f_{\text{em}}$ ), and electronic compositions for **[DCF-MPYA-H]<sup>-</sup>** and **[FL-H]<sup>-</sup>** in DMSO.

| Compound                        | Electronic transition <sup>a</sup> | Excitation energy ( $\lambda_{\text{ab}}/\text{nm}$ ) | $f^b$ | Composition <sup>c</sup> | CI <sup>d</sup> |
|---------------------------------|------------------------------------|-------------------------------------------------------|-------|--------------------------|-----------------|
| <b>[DCF-MPYA-H]<sup>-</sup></b> | $S_1 \rightarrow S_0$              | 2.07 eV (600)                                         | 0.317 | H $\rightarrow$ L        | -0.68           |
|                                 | $S_2 \rightarrow S_0$              | 2.43 eV (509)                                         | 0.211 | H-1 $\rightarrow$ L      | 0.69            |
| <b>[FL-H]<sup>-</sup></b>       | $S_1 \rightarrow S_0$              | 2.01 eV (616)                                         | 0.323 | H $\rightarrow$ L        | 0.68            |
|                                 | $S_2 \rightarrow S_0$              | 2.41 eV (515)                                         | 0.015 | H $\rightarrow$ L+1      | 0.30            |

<sup>a</sup> Only selected excitation states were considered. The numbers in parentheses are the excitation energy in wavelength. <sup>b</sup> Oscillator strength. <sup>c</sup> H stands for HOMO and L stands for LUMO. Only the configurations are presented. <sup>d</sup> Coefficient of the wave function for excitations. The CI coefficients are in absolute values.

**Tab. S10** Calculated electronic transition data in terms of excitation energies ( $E/\text{eV}$ ), emission wavelengths ( $\lambda_{\text{em}}/\text{nm}$ ), oscillator strengths ( $f_{\text{em}}$ ), and electronic compositions for **[DCF-MPYA-2H]<sup>2-</sup>** and **[FL-2H]<sup>2-</sup>** in DMSO.

| Compound                          | Electronic transition <sup>a</sup> | Excitation energy ( $\lambda_{\text{ab}}/\text{nm}$ ) | $f^b$ | Composition <sup>c</sup> | CI <sup>d</sup> |
|-----------------------------------|------------------------------------|-------------------------------------------------------|-------|--------------------------|-----------------|
| <b>[DCF-MPYA-2H]<sup>2-</sup></b> | $S_1 \rightarrow S_0$              | 2.17 eV (571)                                         | 0.335 | H $\rightarrow$ L        | 0.64            |
|                                   | $S_2 \rightarrow S_0$              | 2.44 eV (508)                                         | 0.498 | H $\rightarrow$ L+1      | -0.58           |
| <b>[FL-2H]<sup>2-</sup></b>       | $S_1 \rightarrow S_0$              | 2.12 eV (586)                                         | 0.306 | H $\rightarrow$ L        | 0.68            |
|                                   | $S_2 \rightarrow S_0$              | 2.40 eV (517)                                         | 1.024 | H $\rightarrow$ L+1      | 0.69            |

<sup>a</sup> Only selected excitation states were considered. The numbers in parentheses are the excitation energy in wavelength. <sup>b</sup> Oscillator strength. <sup>c</sup> H stands for HOMO and L stands for LUMO. Only the configurations are presented. <sup>d</sup> Coefficient of the wave function for excitations. The CI coefficients are in absolute values.

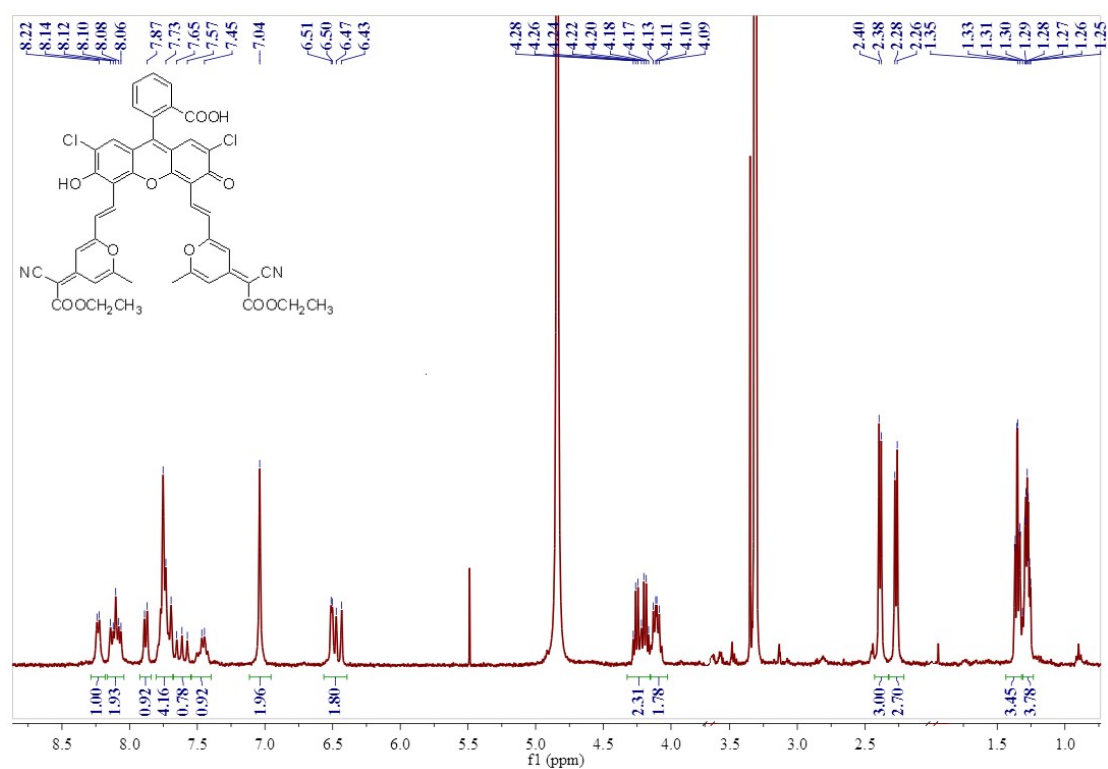

**Fig. S21** <sup>1</sup>H-NMR spectrum of compound DCF-MPYA

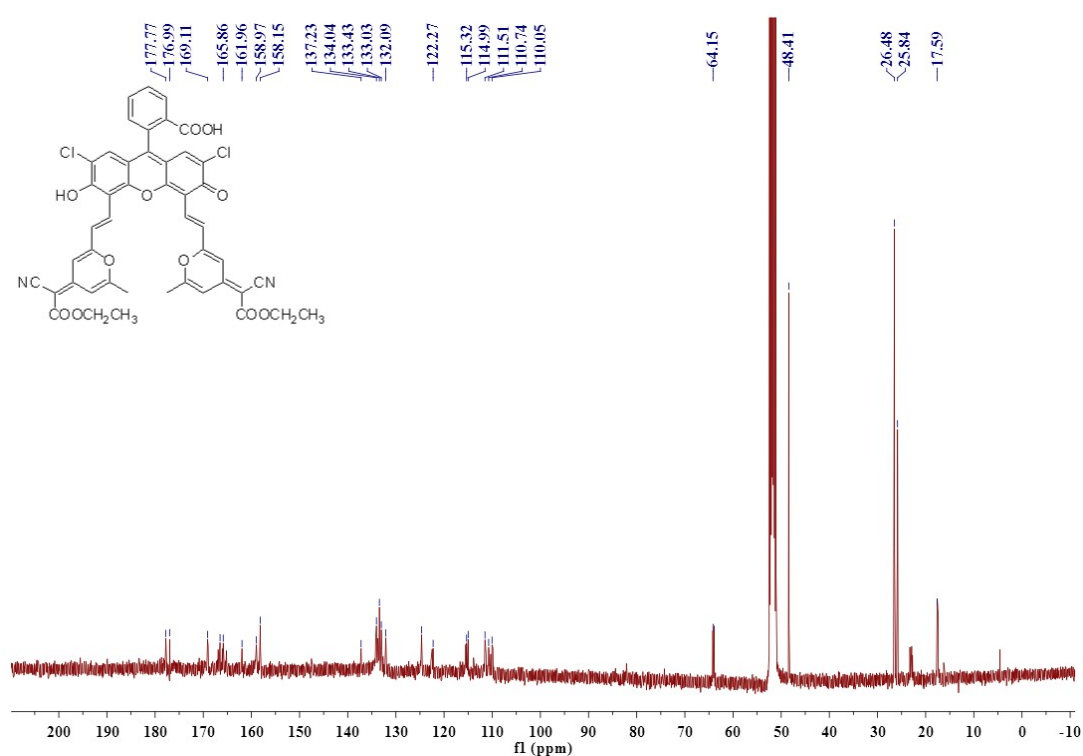

**Fig. S22** <sup>13</sup>C spectrum of compound DCF-MPYA

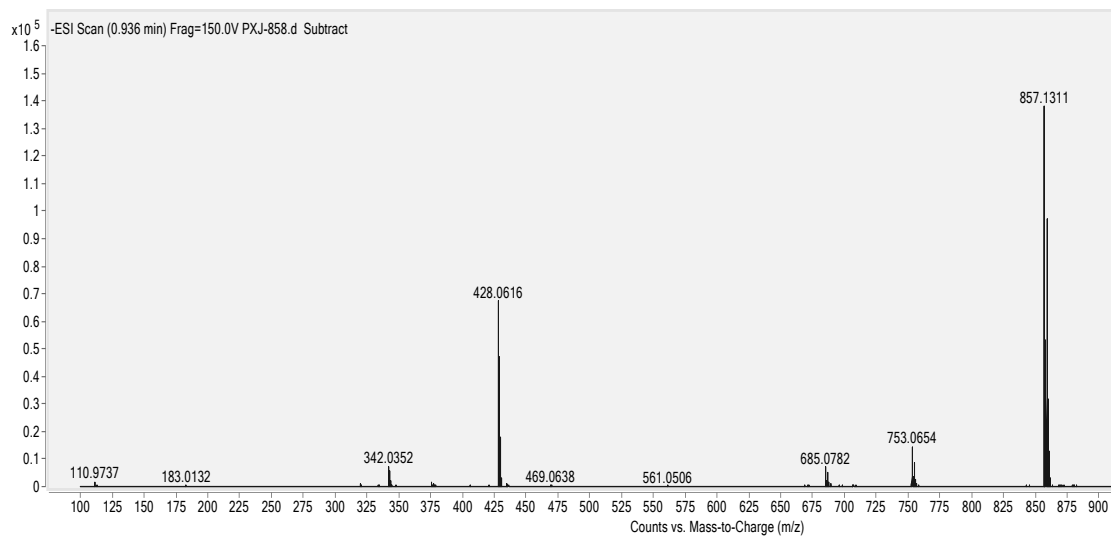

**Fig. S23** HRMS spectrum of compound **DCF-MPYA**

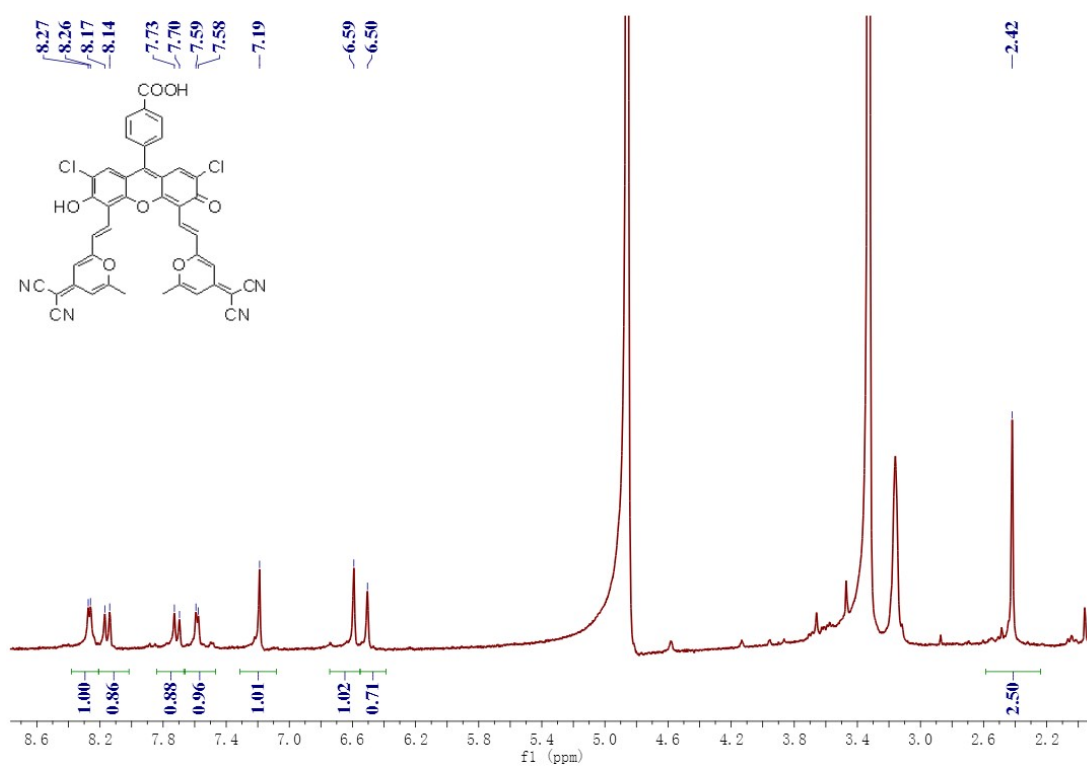

**Fig. S24**  $^1\text{H}$ -NMR spectrum of compound **FL**

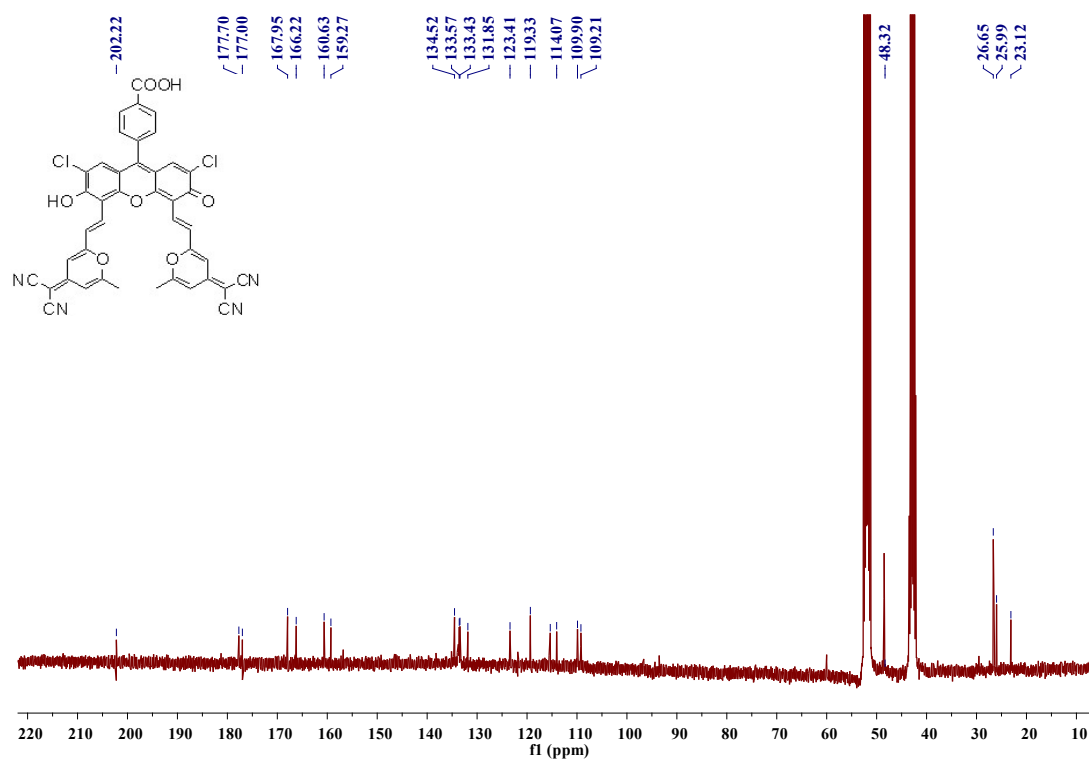

**Fig. S25**  $^{13}\text{C}$  spectrum of compound **FL**

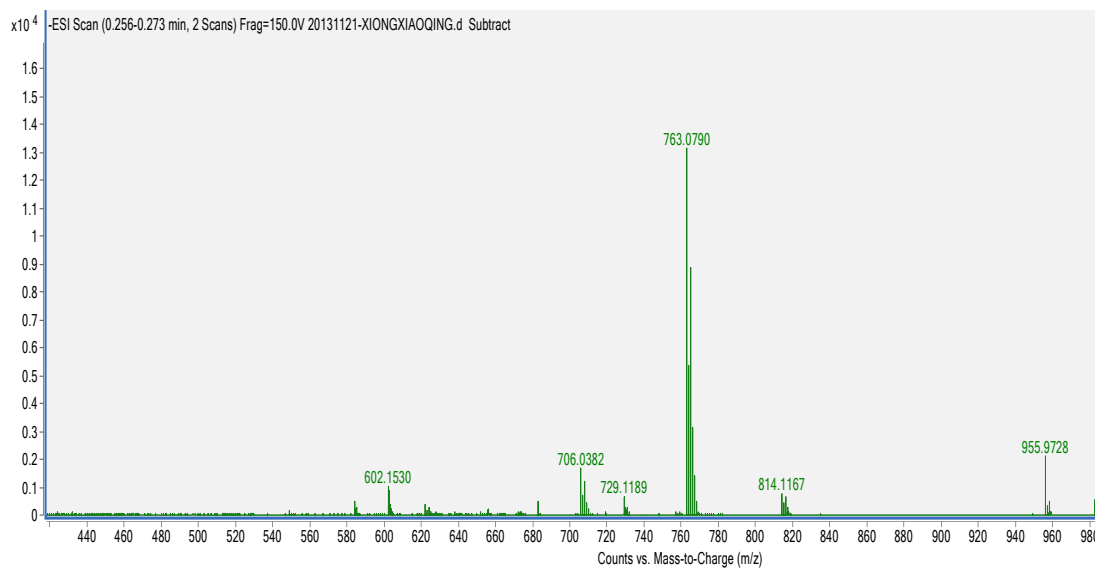

**Fig. S26** HRMS spectrum of compound **FL**

## References

- [1] Grimme, S.; Bannwarth, C.; Dohm, S.; Hansen, A.; Pisarek, J.; Pracht, P.; Seibert, J.; Neese, F. Fully Automated Quantum-Chemistry-Based Computation of Spin-Spin Coupled Nuclear Magnetic Resonance Spectra. *Angew. Chem., Int. Ed.*, 2017, 56, 14763–14769.
- [2] Bannwarth, C.; Ehlert, S.; Grimme, S. Gfn2-Xtb-an Accurate and Broadly Parametrized Self-Consistent Tight-Binding Quantum Chemical Method with Multipole Electrostatics and Density-Dependent Dispersion Contributions. *J. Chem. Theory Comput.*, 2019, 15, 1652–1671.
- [3] Xtb, Version 6.1; University Bonn: 2019; please contact [xtb@thch.uni-bonn.de](mailto:xtb@thch.uni-bonn.de) for access to the program.
- [4] Grimme, S. Exploration of Chemical Compound, Conformer, and Reaction Space with Meta- Dynamics Simulations Based on Tight-Binding Quantum Chemical Calculations. *J. Chem. Theory Comput.*, 2019, 15, 2847–2862.
- [5] Frisch, M. J.; Trucks, G. W.; Schlegel, H. B.; Scuseria, G. E.; Robb, M. A.; Cheeseman, J. R.; Scalmani, G.; Barone, V.; Mennucci, B.; Petersson, G. A.; Nakatsuji, H.; Caricato, M.; Li, X.; Hratchian, H. P.; Izmaylov, A. F.; Bloino, J.; Zheng, G.; Sonnenberg, J. L.; Hada, M.; Ehara, M.; Toyota, K.; Fukuda, R.; Hasegawa, J.; Ishida, M.; Nakajima, T.; Honda, Y.; Kitao, O.; Nakai, H.; Vreven, T.; Montgomery, J. A., Jr; Peralta, J. E.; Ogliaro, F.; Bearpark, M.; Heyd, J. J.; Brothers, E.; Kudin, K. N.; Staroverov, V. N.; Kobayashi, R.; Normand, J.; Raghavachari, K.; Rendell, A.; Burant, J. C.; Iyengar, S. S.; Tomasi, J.; Cossi, M.; Rega, N.; Millam, J.

M.; Klene, M.; Knox, J. E.; Cross, J. B.; Bakken, V.; Adamo, C.; Jaramillo, J.; Gomperts, R.; Stratmann, R. E.; Yazyev, O.; Austin, A. J.; Cammi, R.; Pomelli, C.; Ochterski, J. W.; Martin, R. L.; Morokuma, K.; Zakrzewski, V. G.; Voth, G. A.; Salvador, P.; Dannenberg, J. J.; Dapprich, S.; Daniels, A. D.; Farkas, O.; Foresman, J. B.; Ortiz, J. V.; Cioslowski, J.; Fox, D. J. Gaussian 09, Revision A. 02.

[6] Adamo, C.; Barone, V. Toward reliable density functional methods without adjustable parameters: The PBE0 model. *J. Chem. Phys.*, 1999, 110, 6158–6170.

[7] Grimme, S.; Ehrlich, S.; Goerigk, L. Effect of the damping function in dispersion corrected density functional theory. *J. Comput. Chem.*, 2011, 32, 1456–1465.

[8] Luchini, G.; Alegre-Requena, J. V.; Funes-Ardoiz, I.; Paton, R. S. GoodVibes: Automated Thermochemistry for Heterogeneous Computational Chemistry Data. *F1000Res.* 2020, 9, 291.

[9] (a) Grimme, S. Supramolecular Binding Thermodynamics by Dispersion-Corrected Density Functional Theory. *Chem.–Eur. J.*, 2012, 18, 9955–9964. (b) Li, Y.-P.; Gomes, J.; Sharada, S. M.; Bell, A. T.; Head-Gordon, M. Improved Force-Field Parameters for QM/MM Simulations of the Energies of Adsorption for Molecules in Zeolites and a Free Rotor Correction to the Rigid Rotor Harmonic Oscillator Model for Adsorption Enthalpies. *J. Phys. Chem. C*, 2015, 119, 1840–1850.

[10] (a) B. Mennucci and J. Tomasi, Continuum Solvation Models: A New Approach to the Problem of Solute's Charge Distribution and Cavity Boundaries, *J. Chem. Phys.*, 1997, 106, 5151–5158; (b) V. Barone and M. Cossi, Quantum Calculation of

Molecular Energies and Energy Gradients in Solution by a Conductor Solvent Model,

J. Phys. Chem. A, 1998, 102, 1995–2001.

[11] Legault, C. Y. CYLView, version 1.0b; Université de Sherbrooke: Sherbrooke, Quebec, Canada, 2009.

[12] Michael W. Allen, Thermo Fisher Scientific, Madison, WI, USA 2010.
